# Supplementary material
Source: PubMed Central journal article supplement (PMC10992619)

A

|                                 | Patient number    | Number of pretreatments | Type of pretreatment      | date of pretreatment          | time interval to investigated MWA (days) |
|---------------------------------|-------------------|-------------------------|---------------------------|-------------------------------|------------------------------------------|
| Prospective Patients            | 5                 | 1                       | RFA                       | 12/2015                       | 580                                      |
|                                 | 6                 | 1                       | MWA                       | 04/2016                       | 472                                      |
|                                 | 7                 | 1                       | MWA                       | 06/2016                       | 310                                      |
|                                 | 10                | 1                       | surgical resection        | 01/2017                       | 226                                      |
|                                 | 14                | 1                       | surgical resection        | 04/2017                       | 215                                      |
|                                 | 16                | 1                       | TAE                       | 12/2016                       | 119                                      |
|                                 | 17                | 3                       | 3 x TACE                  | 12/2014<br>02/2015<br>03/2015 | 687                                      |
|                                 | 20                | 1                       | RFA                       | 06/2016                       | 588                                      |
|                                 | 23                | 1                       | surgical resection        | 06/2017                       | 289                                      |
|                                 | Relapsed Patients | 5                       | 1                         | RFA                           | 12/2015                                  |
| 3                               |                   | 3                       | surgical resection        | 07/2013                       | 200                                      |
|                                 |                   |                         | TACE                      | 07/2013                       |                                          |
|                                 |                   |                         | surgical resection        | 11/2013                       |                                          |
| 8                               |                   | 1                       | stereotactic radiotherapy | 07/2015                       | 406                                      |
| 9                               |                   | 1                       | surgical resection        | 05/2015                       | 389                                      |
| 11                              |                   | 4                       | RFA                       | 11/2011                       | 441                                      |
|                                 |                   |                         | RFA                       | 2013                          |                                          |
|                                 |                   |                         | Gammaknife                | 07/2015                       |                                          |
| 12                              |                   | 1                       | MWA                       | 03/2016                       | 119                                      |
| 13                              |                   | 3                       | TAE                       | 12/2016                       |                                          |
| TACE                            |                   |                         | 12/2014                   |                               |                                          |
| 13                              |                   | 3                       | TACE                      | 02/2015                       | 687                                      |
|                                 |                   | TACE                    | 03/2015                   |                               |                                          |
| Patients in Long-term Remission | 17                | 1                       | MWA                       | 03/2014                       | 907                                      |
|                                 | 4                 | 1                       | RFA                       | 02/2013                       | 753                                      |
|                                 | 9                 | 2                       | surgical resection        | 2013                          | 527                                      |
|                                 | 11                | 3                       | RFA                       | 02/2013                       | 252                                      |
|                                 |                   |                         | RFA                       | 11/2011                       |                                          |
|                                 | 14                | 1                       | Cyberknife                | 02/2015                       | 77                                       |
| 14                              | 1                 | MWA                     | 03/2015                   | 77                            |                                          |
| Mean                            |                   |                         |                           |                               | 420                                      |

B

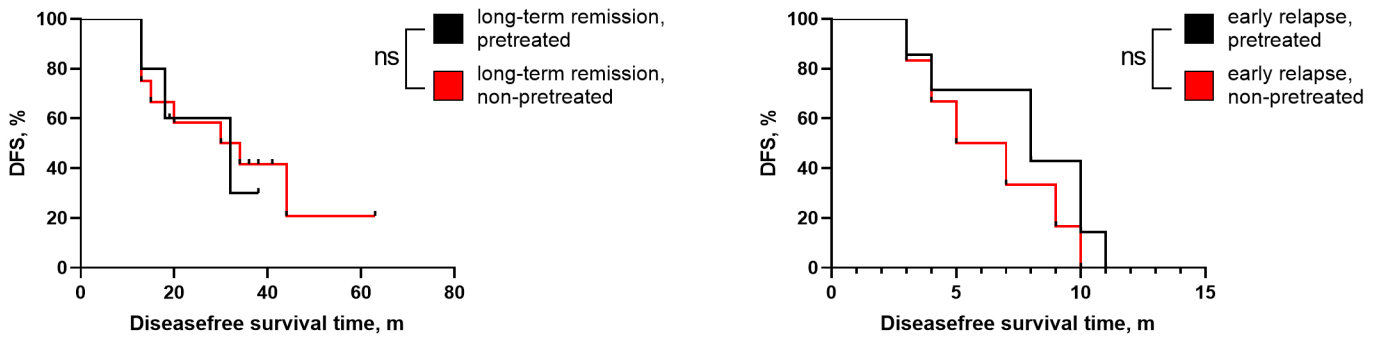

C

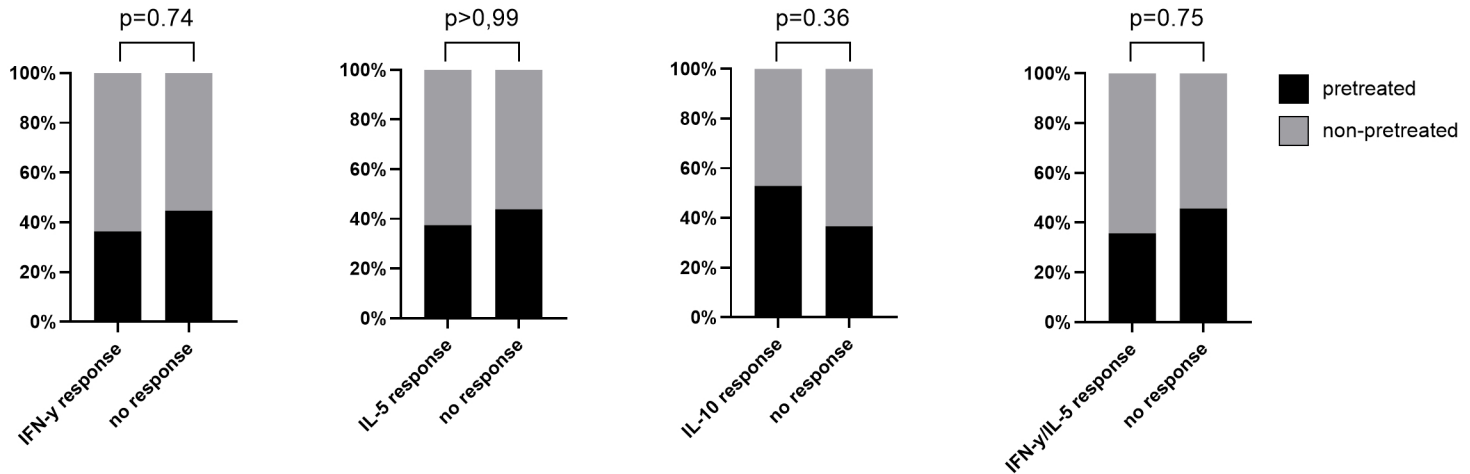

Supplement: 262_2020_2734_MOESM6_ESM.pdf [file 262_2020_2734_MOESM6_ESM.pdf]
