# Supplementary material
Source: PubMed Central journal article supplement (PMC10992619)
Supplement: 262_2020_2734_MOESM1_ESM.pdf [file 262_2020_2734_MOESM1_ESM.pdf]

| Epitop  | Host   | Company, Catalog Number   | Isotype | Dilution |
|---------|--------|---------------------------|---------|----------|
| CD3     | rabbit | LS Bio LS-B8669           | IgG     | 1:100    |
| CD8     | mouse  | Dianova DLN-009534        | IgG1    | 1:50     |
| FoxP3   | mouse  | Abcam ab20034             | IgG1    | 1:50     |
| HLA-ABC | mouse  | Abcam ab70328             | IgG1    | 1:100    |
| CD20    | mouse  | Zytomed MSK008-05         | IgG2a   | 1:100    |
| CD4     | rabbit | Abcam ab133616            | IgG     | 1:100    |
| CD38    | mouse  | Novocastra NCL-L-CD38-290 | IgG1    | 1:100    |

| Fluorochrome    | Target         | Clone     | Company       | Catalogue No. |
|-----------------|----------------|-----------|---------------|---------------|
| FITC            | CD45           | HI30      | Biolegend     | 304038        |
| PE              | CD273 (PD-L2)  | MIH18     | Biolegend     | 345506        |
| PE              | CD226 (DNAM-1) | 11A8      | Biolegend     | 338306        |
| PE              | CD270 (HVEM)   | 122       | Biolegend     | 318806        |
| PE              | CD258 (LIGHT)  | T5-39     | Biolegend     | 318706        |
| PE              | CD48           | BJ40      | Biolegend     | 336708        |
| PE              | CD197 (CCR7)   | G043H7    | Biolegend     | 353204        |
| PE              | CD152 (CTLA-4) | BNI3      | BD Bioscience | 555853        |
| PE              | CD69           | FN50      | Biolegend     | 310906        |
| PE              | CD86           | IT2.2     | Biolegend     | 305406        |
| PE              | CD158k         | 539304    | R&D Systems   | FAB2878P      |
| PE-Dazzle       | CD134 (OX40)   | Ber-ACT35 | Biolegend     | 350020        |
| PE-Dazzle       | CD155 (PVR)    | SKII.4    | Biolegend     | 337616        |
| PE-Dazzle       | CD154 (CD40L)  | 24-31     | Biolegend     | 310840        |
| PE-Dazzle       | CD366 (Tim-3)  | F38-2E2   | Biolegend     | 345034        |
| PE-Dazzle       | CD244 (2B4)    | C1.7      | Biolegend     | 329522        |
| PE-Dazzle       | CD185 (CXCR5)  | J252D4    | Biolegend     | 356928        |
| PE-Dazzle       | CD25           | M-A251    | Biolegend     | 356126        |
| PE-Dazzle       | CD28           | CD28.2    | Biolegend     | 302942        |
| PE-Dazzle       | IgD            | IA6-2     | Biolegend     | 348240        |
| PerCP-Cy5.5     | CD40           | 5C3       | Biolegend     | 334316        |
| PerCP-Cy5.5     | CD268 (BAFF-R) | 11C1      | Biolegend     | 316918        |
| PerCP-Cy5.5     | CD160          | BY55      | Biolegend     | 341210        |
| PerCP-Cy5.5     | Galectin-9     | 9M1-3     | Biolegend     | 348910        |
| PerCP-Cy5.5     | CD305 (LAIR1)  | NKTA255   | Biolegend     | 342804        |
| PerCP-Cy5.5     | CD8            | SK1       | Biolegend     | 344710        |
| PerCP-Cy5.5     | CD127          | A019D5    | Biolegend     | 351322        |
| PerCP-Cy5.5     | CD24           | ML5       | Biolegend     | 311116        |
| PerCP-Cy5.5     | CD158b         | DX27      | Biolegend     | 312614        |
| PE-Cy7          | CD56           | 5.1H11    | Biolegend     | 362510        |
| PE-Cy7          | CD45RA         | HI100     | Biolegend     | 304126        |
| PE-Cy7          | CD73           | A2D       | Biolegend     | 344010        |
| PE-Cy7          | CD27           | O323      | Biolegend     | 302838        |
| Alexa Fluor 647 | CD279 (PD1)    | EH12.1    | BD Bioscience | 560838        |
| Alexa Fluor 647 | FoxP3          | 259D      | Biolegend     | 320214        |

|                 |                       |         |               |             |
|-----------------|-----------------------|---------|---------------|-------------|
| APC             | CD96 (TACTILE)        | REA195  | Miltenyi      | 130-101-028 |
| APC             | CD159a (NKG2A)        | REA110  | Miltenyi      | 130-113-563 |
| APC             | CD66 ace              | ASL-32  | Biolegend     | 342308      |
| APC             | VISTA                 | 730804  | R&D Systems   | FAB71261A   |
| APC             | CD21                  | Bu32    | Biolegend     | 354906      |
| APC             | CD178                 | NOK-1   | Miltenyi      | 130-096-458 |
| Alexa Fluor 700 | CD3                   | SK7     | Biolegend     | 344822      |
| Alexa Fluor 700 | CD20                  | 2H7     | Biolegend     | 302322      |
| APC-Fire 750    | CD19                  | SJ25C1  | Biolegend     | 363030      |
| APC-Fire 750    | CD4                   | SK3     | Biolegend     | 344638      |
| APC-Fire 750    | CD8                   | SK1     | Biolegend     | 344746      |
| BV421           | CD274 (PD-L1)         | 29E.2A3 | Biolegend     | 329714      |
| BV421           | TIGIT                 | A15153G | Biolegend     | 372710      |
| BV421           | CD272 (BTLA)          | MIH26   | Biolegend     | 344512      |
| BV421           | CD223 (LAG3)          | 11C3C65 | Biolegend     | 369314      |
| BV421           | CD357 (GITR)          | 108-17  | Biolegend     | 371208      |
| BV421           | CD278 (ICOS)          | C398.4A | Biolegend     | 313524      |
| BV421           | CD39                  | A1      | Biolegend     | 328214      |
| BV421           | CD137 (4-1BB)         | 4B4-1   | Biolegend     | 309820      |
| BV421           | CD38                  | HIT2    | Biolegend     | 303526      |
| BV421           | CD158a                | HP-3E4  | BD Bioscience | 564318      |
| Zombie Aqua     | fixable viability dye |         | Biolegend     | 423102      |
