# Supplementary material
Source: PubMed Central journal article supplement (PMC10992619)
Supplement: 262_2020_2734_MOESM2_ESM.pdf [file 262_2020_2734_MOESM2_ESM.pdf]

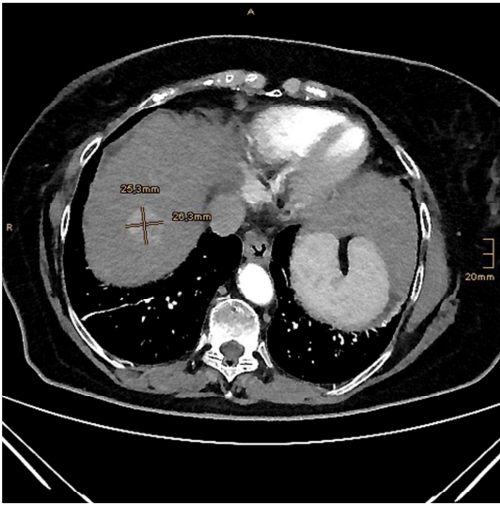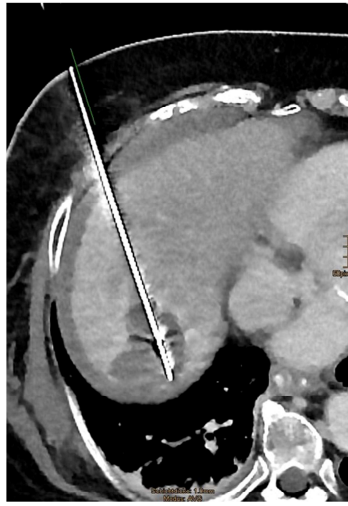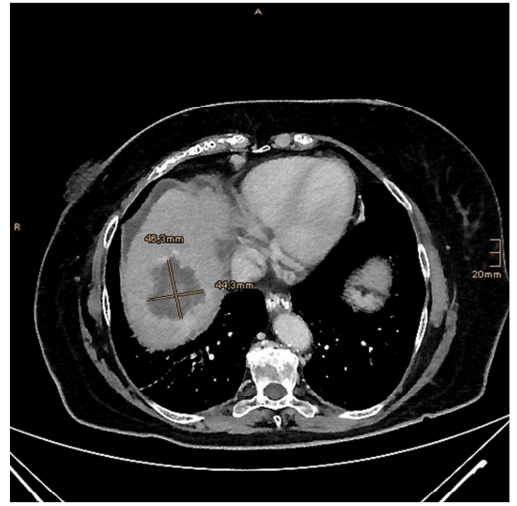

Calculation of ablation:tumor ratio:

$$d_{\text{max Ablation}} / d_{\text{max Tumor}}$$
