# Supplementary material
Source: PubMed Central journal article supplement (PMC10992619)

A

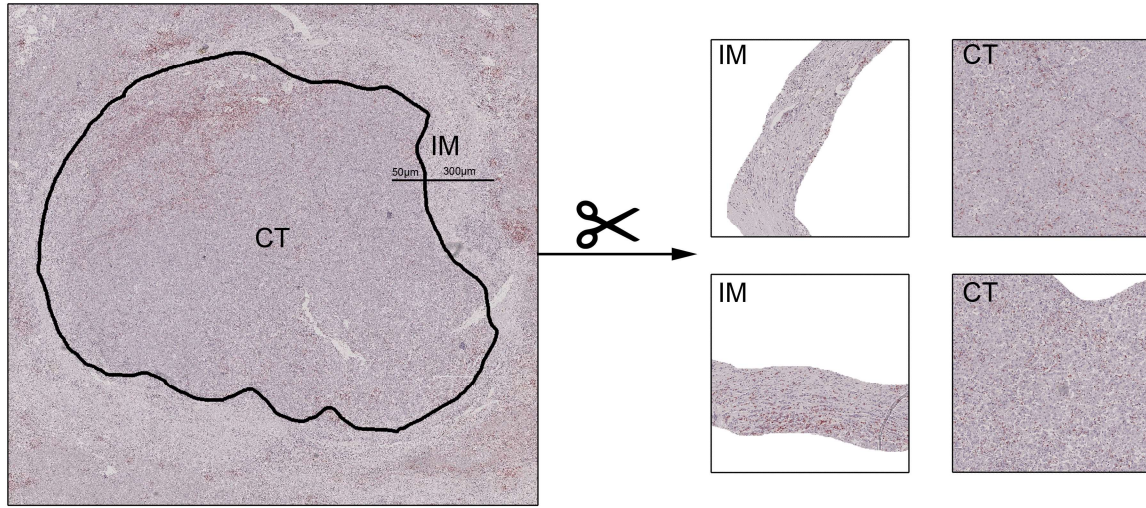

B

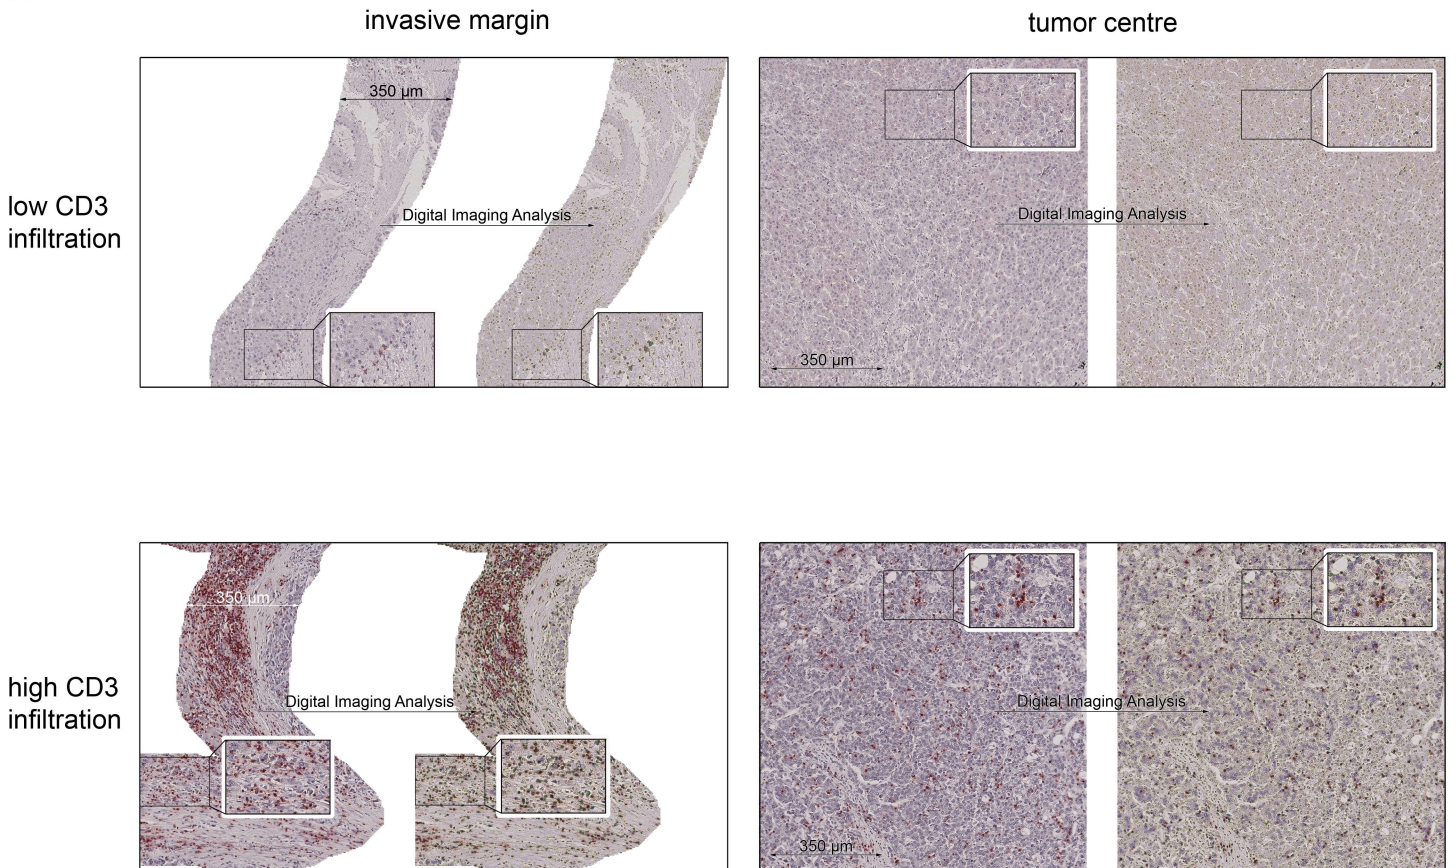

Supplement: 262_2020_2734_MOESM4_ESM.pdf [file 262_2020_2734_MOESM4_ESM.pdf]
