# Supplementary material
Source: PubMed Central journal article supplement (PMC10992619)
Supplement: 262_2020_2734_MOESM7_ESM.pdf [file 262_2020_2734_MOESM7_ESM.pdf]

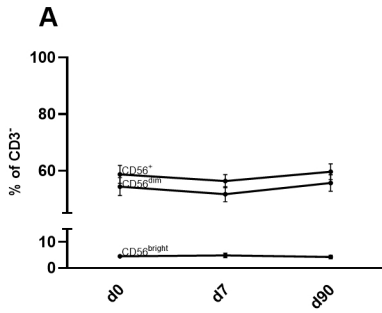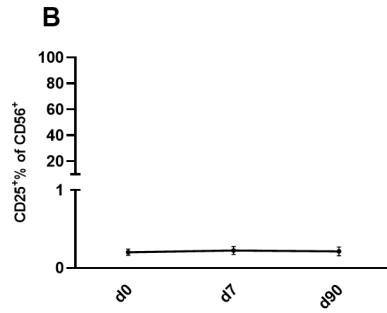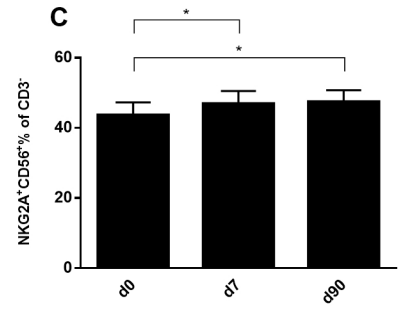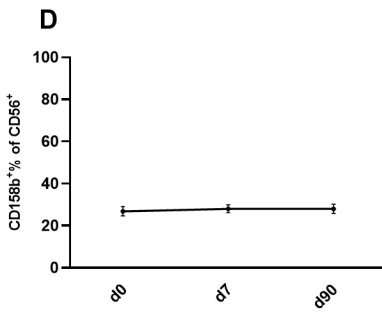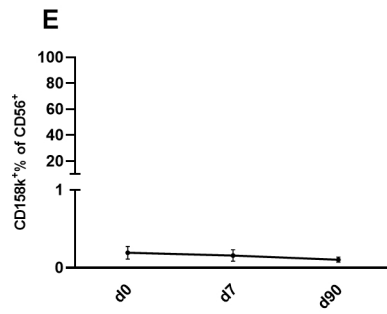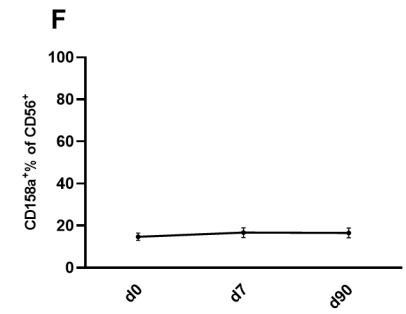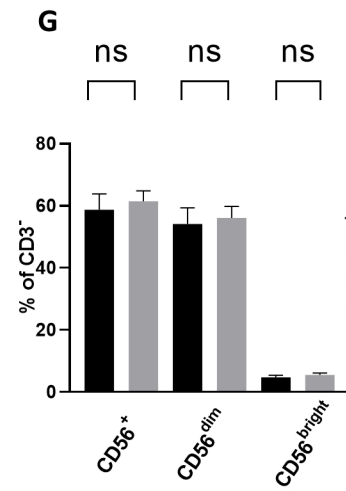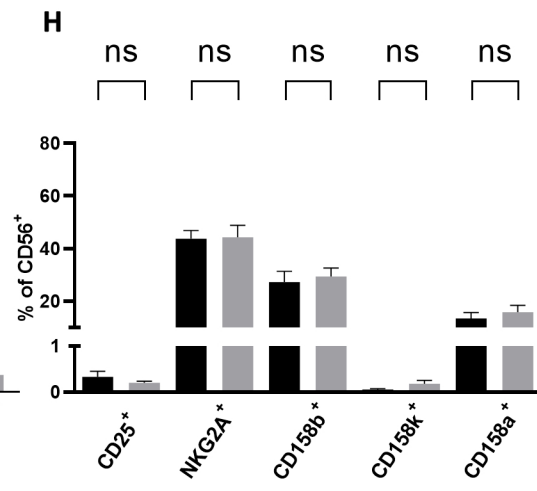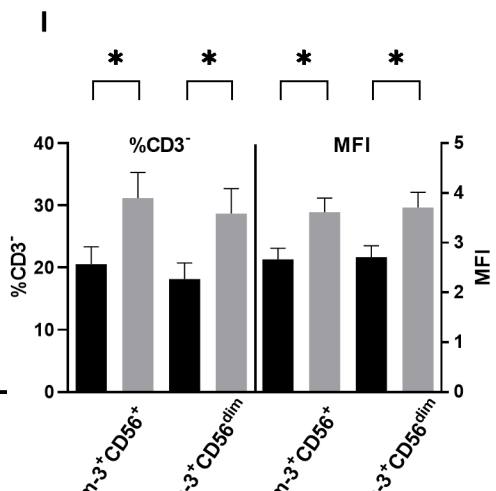

■ long-term remission

■ early relapse
